# Supplementary material for: Highly effective adsorption of xanthene dyes (rhodamine B and erythrosine B) from aqueous solutions onto lemon citrus peel active carbon: characterization, resolving analysis, optimization and mechanistic studies
Source: Royal Society of Chemistry journal article supplement (doi:10.1039/c6ra23157h), 2017-01-01
Supplement: c6ra23157h1.pdf [file c6ra23157h1.pdf]

### Supplementary content

Fig. S1. Graphical presentation of central composite design with 3 factors.

Fig. S2. Fine structure of surface of lemon citrus peels carbon active

Fig. S3. Surface potential of lemon citrus powder carbon active

Fig. S4. Ratio-derivative spectra for (a) EB (b) RB (dye concentration = 1, 2, 4, 6, and 8 mg/l, the other dye concentration = 5 mg/l in all cases.

Fig. S5. Isotherms of single and binary dyes (A) Langmuir adsorption isotherm (B) Dubinine-Radushkovich adsorption isotherm. Temperature 25<sup>o</sup> C, pH =4, adsorbent dose 0.3 g/l.

Fig. S6. Dye adsorption rate in single and binary dyes fitted to pseudo-second order kinetic equation. Initial dye concentration 20 mg/l, temperature 25<sup>o</sup> C, pH =4, adsorbent dose 0.3 g/l.

**Table S1.** Analysis of variance (ANOVA) for removal of EB and RB dyes

**Table S2 :** kinetic parameter for dye adsorption, T = 25<sup>o</sup>c , pH = 4 , adsorbent = 0.3 g/l.

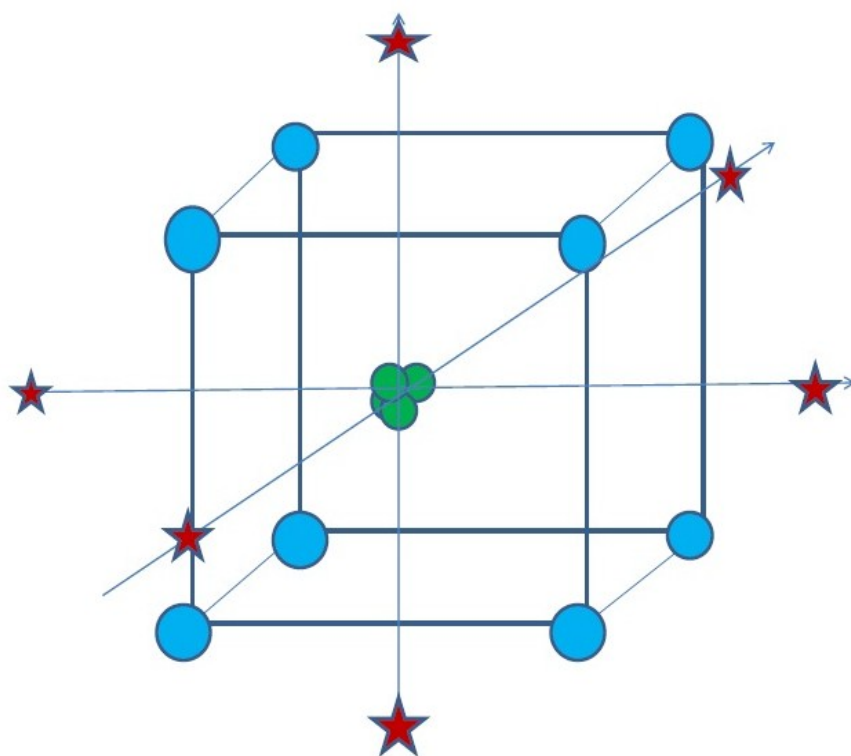

Fig. S1. Graphical presentation of central composite design with 3 factors

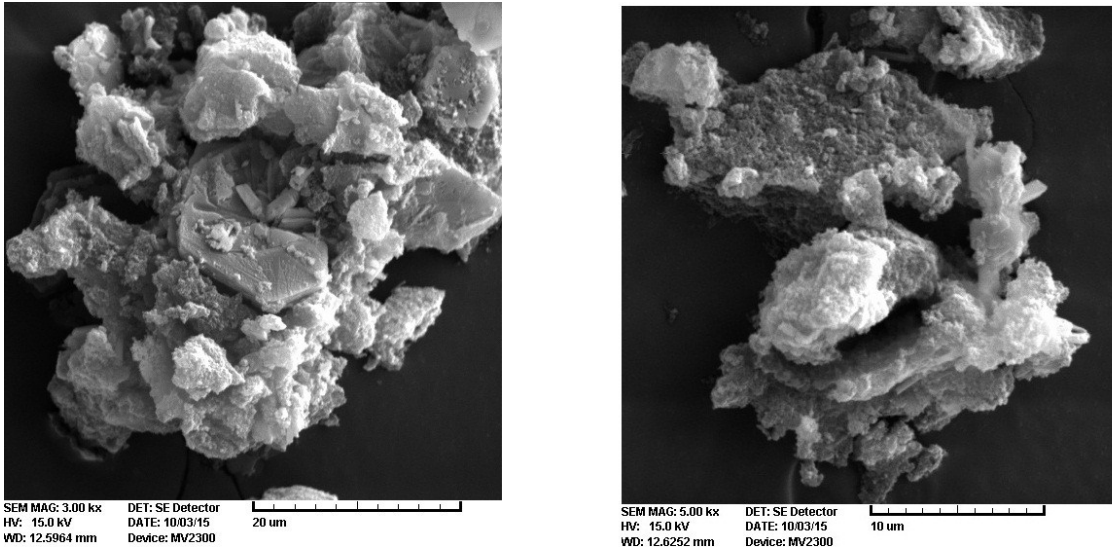

Fig.S2. Fine structure of surface of lemon citrus peels carbon active

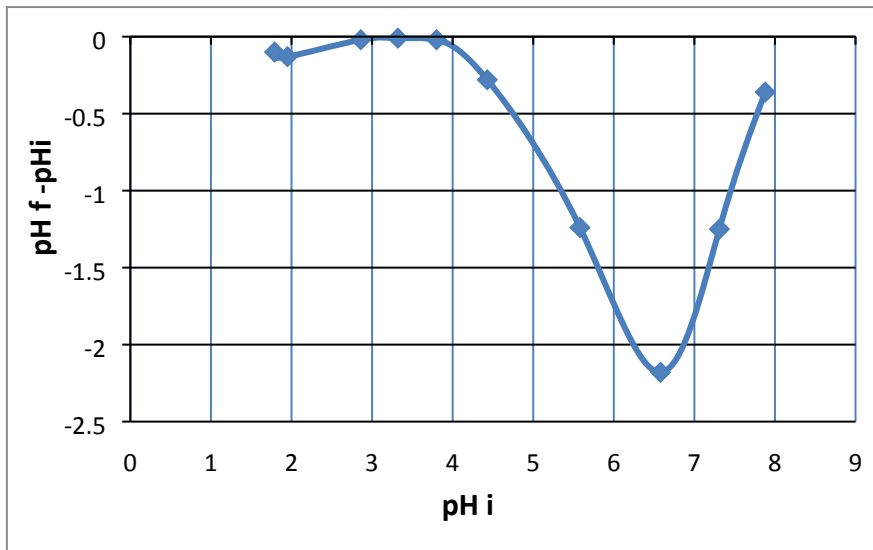

Fig.S3. Surface potential of lemon citrus powder carbon active

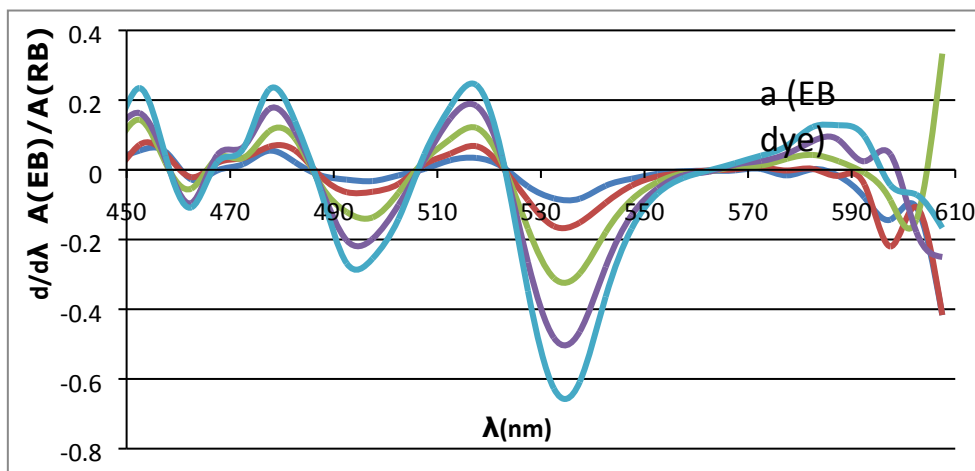

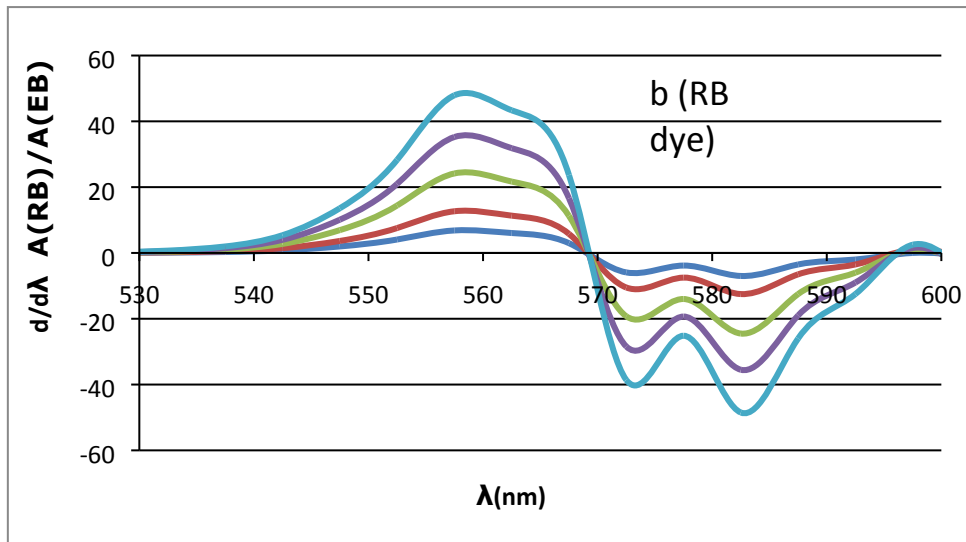

Fig. S4. Ratio-derivative spectra for (a) EB (b) RB (dye concentration = 1, 2, 4, 6, and 8 mg/l, the other dye concentration = 5 mg/l in all cases.

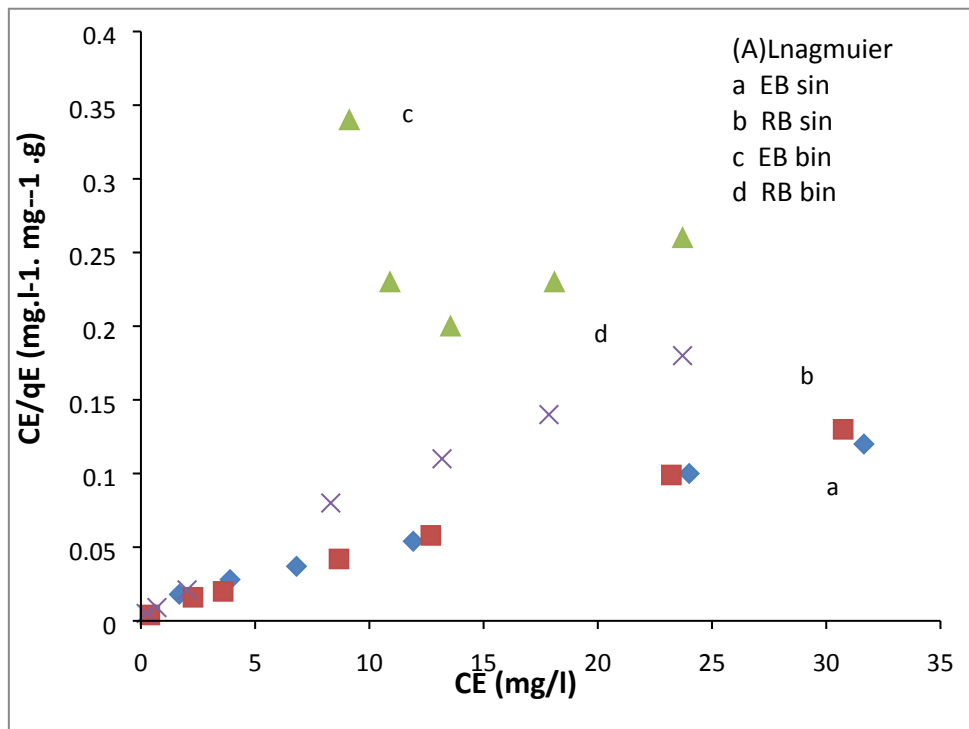

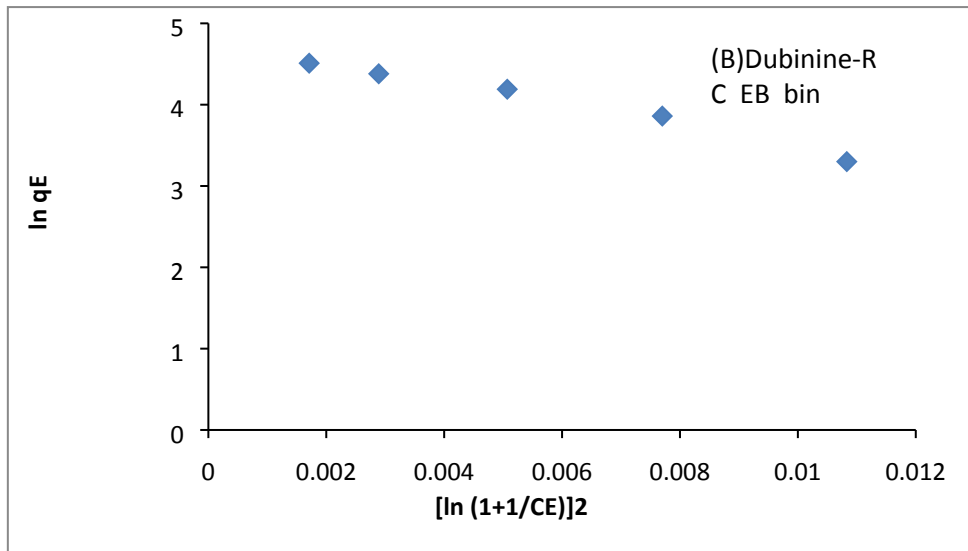

Fig. S5. Isotherms of single and binary dyes (A) Langmuir adsorption isotherm (B) Dubinin-Radushkovich adsorption isotherm. Temperature 25<sup>0</sup> C, pH =4, adsorbent dose 0.3 g/l.

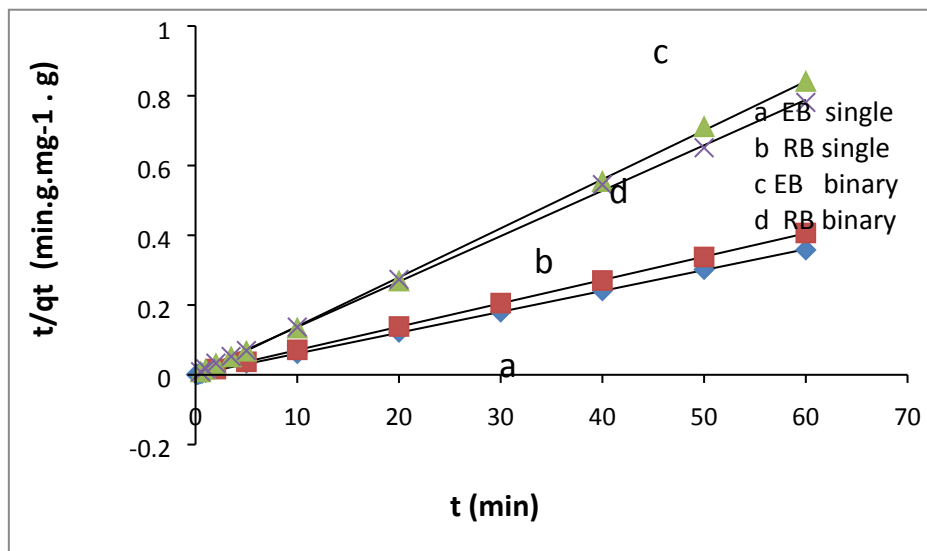

Fig. S6. Dye adsorption rate in single and binary dyes fitted to pseudo-second order kinetic equation. Initial dye concentration 20 mg/l , temperature 25<sup>0</sup> C, pH =4, adsorbent dose 0.3 g/l.

**Table S1.** Analysis of variance (ANOVA) for removal of EB and RB dyes

| Source of variation           | EB    |    |       |         |          | RB            |           |               |              |                   |
|-------------------------------|-------|----|-------|---------|----------|---------------|-----------|---------------|--------------|-------------------|
|                               | SS    | DF | MS    | F-Value | P- value | SS            | DF        | MS            | F-Value      | P- value          |
| model                         | 1753  | 9  | 194.8 | 52.16   | <0.0001  | <b>102.1</b>  | <b>9</b>  | <b>11.34</b>  | <b>25.78</b> | <b>&lt;0.0001</b> |
| X <sub>1</sub>                | 787.4 | 1  | 787.4 | 210.8   | <0.0001  | <b>0.0190</b> | <b>1</b>  | <b>0.0190</b> | <b>0.043</b> | <b>0.8407</b>     |
| X <sub>2</sub>                | 379.6 | 1  | 379.6 | 101.6   | <0.0001  | <b>4.69</b>   | <b>1</b>  | <b>4.690</b>  | <b>10.65</b> | <b>0.0085</b>     |
| X <sub>3</sub>                | 40.99 | 1  | 40.99 | 10.98   | 0.0078   | <b>29.23</b>  | <b>1</b>  | <b>29.23</b>  | <b>66.44</b> | <b>&lt;0.0001</b> |
| X <sub>1</sub> X <sub>2</sub> | 318.3 | 1  | 318.3 | 85.23   | <0.0001  | <b>4.48</b>   | <b>1</b>  | <b>4.48</b>   | <b>10.19</b> | <b>0.0096</b>     |
| X <sub>1</sub> X <sub>3</sub> | 48.61 | 1  | 48.61 | 13.02   | 0.0048   | <b>29.84</b>  | <b>1</b>  | <b>29.84</b>  | <b>67.82</b> | <b>&lt;0.0001</b> |
| X <sub>2</sub> X <sub>3</sub> | 62.61 | 1  | 62.61 | 16.76   | 0.0022   | <b>7.20</b>   | <b>1</b>  | <b>7.20</b>   | <b>16.36</b> | <b>0.0023</b>     |
| X <sub>1</sub> <sup>2</sup>   | 84.62 | 1  | 84.62 | 22.66   | 0.0008   | <b>2.04</b>   | <b>1</b>  | <b>2.04</b>   | <b>4.64</b>  | <b>0.0567</b>     |
| X <sub>2</sub> <sup>2</sup>   | 41.75 | 1  | 41.75 | 11.18   | 0.0074   | <b>3.09</b>   | <b>1</b>  | <b>3.09</b>   | <b>7.03</b>  | <b>0.0243</b>     |
| X <sub>3</sub> <sup>2</sup>   | 1.930 | 1  | 1.930 | 0.5200  | 0.4891   | <b>20.83</b>  | <b>1</b>  | <b>20.83</b>  | <b>47.34</b> | <b>&lt;0.0001</b> |
| Residual                      | 37.34 | 10 | 3.734 | -       | -        | <b>4.400</b>  | <b>10</b> | <b>0.4400</b> | -            | -                 |
| lack of fitness               | 30.38 | 5  | 6.08  | 4.36    | 0.0659   | <b>2.39</b>   | <b>5</b>  | <b>0.480</b>  | <b>1.19</b>  | <b>0.4261</b>     |
| Pure error                    | 6.970 | 5  | 1.390 |         |          | <b>2.01</b>   | <b>5</b>  | <b>0.400</b>  |              |                   |
| Total                         | 1790  | 19 |       |         |          | <b>106.49</b> | <b>19</b> |               |              |                   |

**Table S2** : kinetic parameter for dye adsorption, T = 25 °c , pH = 4 , adsorbent = 0.3 g/l.

| Equation                                                                                                          | Single solution |             | Binary solution |             |
|-------------------------------------------------------------------------------------------------------------------|-----------------|-------------|-----------------|-------------|
|                                                                                                                   | Erythrosin B    | Rhodamine B | Erythrosine B   | Rhodamine B |
| <b>Pesudo first order</b>                                                                                         |                 |             |                 |             |
| $R^2$                                                                                                             | 0.95            | 0.96        | 0.88            | 0.87        |
| $Ln(q_e - q_t) = Ln q_e - K_1 t$                                                                                  |                 |             |                 |             |
| $K_1(\text{min}^{-1})$                                                                                            | 2.17            | 0.08        | 0.29            | 0.61        |
| Plot the values of $Ln(q_e - q_t)$ against $t$ give a linear relationship that $q_e$ and $K_1$ can be determined. |                 |             |                 |             |
| $q_{\text{exp}}(\text{mg g}^{-1})$                                                                                | 149.25          | 148.16      | 73.38           | 72.97       |
| $q_{\text{calc}}(\text{mg g}^{-1})$                                                                               | 19.87           | 21.89       | 14.00           | 29.76       |
| <b>Pesudo second order</b>                                                                                        |                 |             |                 |             |
| $R^2$                                                                                                             | 0.999           | 1.000       | 0.999           | 0.999       |
| $t/q_t = 1/k_2 q_e^2 + t/q_e$                                                                                     |                 |             |                 |             |
| $K_2(\text{g mg}^{-1} \text{min}^{-1})$                                                                           | 0.04            | 0.04        | 0.20            | 0.09        |
| Plot the values of $t/q_t$ against $t$ give a linear relationship with $k_2$ and $q_e$ can be determined.         |                 |             |                 |             |
| $q_{\text{exp}}(\text{mg g}^{-1})$                                                                                | 149.25          | 148.16      | 73.38           | 72.97       |
| $q_{\text{calc}}(\text{mg g}^{-1})$                                                                               | 166.67          | 166.67      | 71.43           | 76.92       |
